# Supplementary material
Source: PubMed Central journal article supplement (PMC2576291)

Suppl. Fig. 7

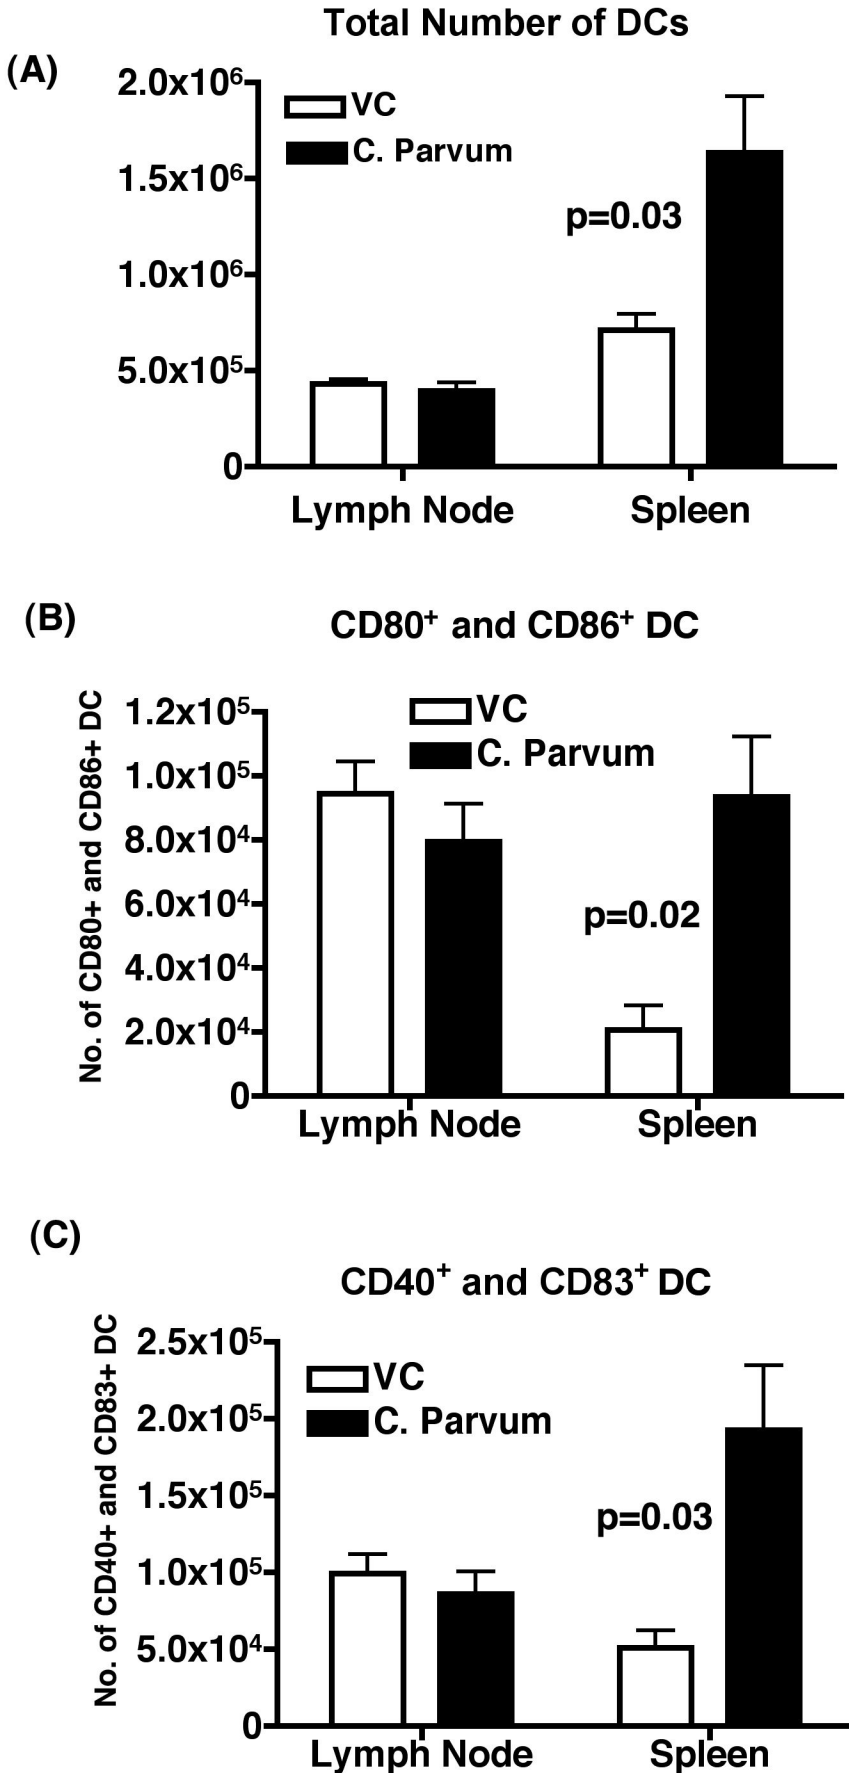

Supplemental Fig 8

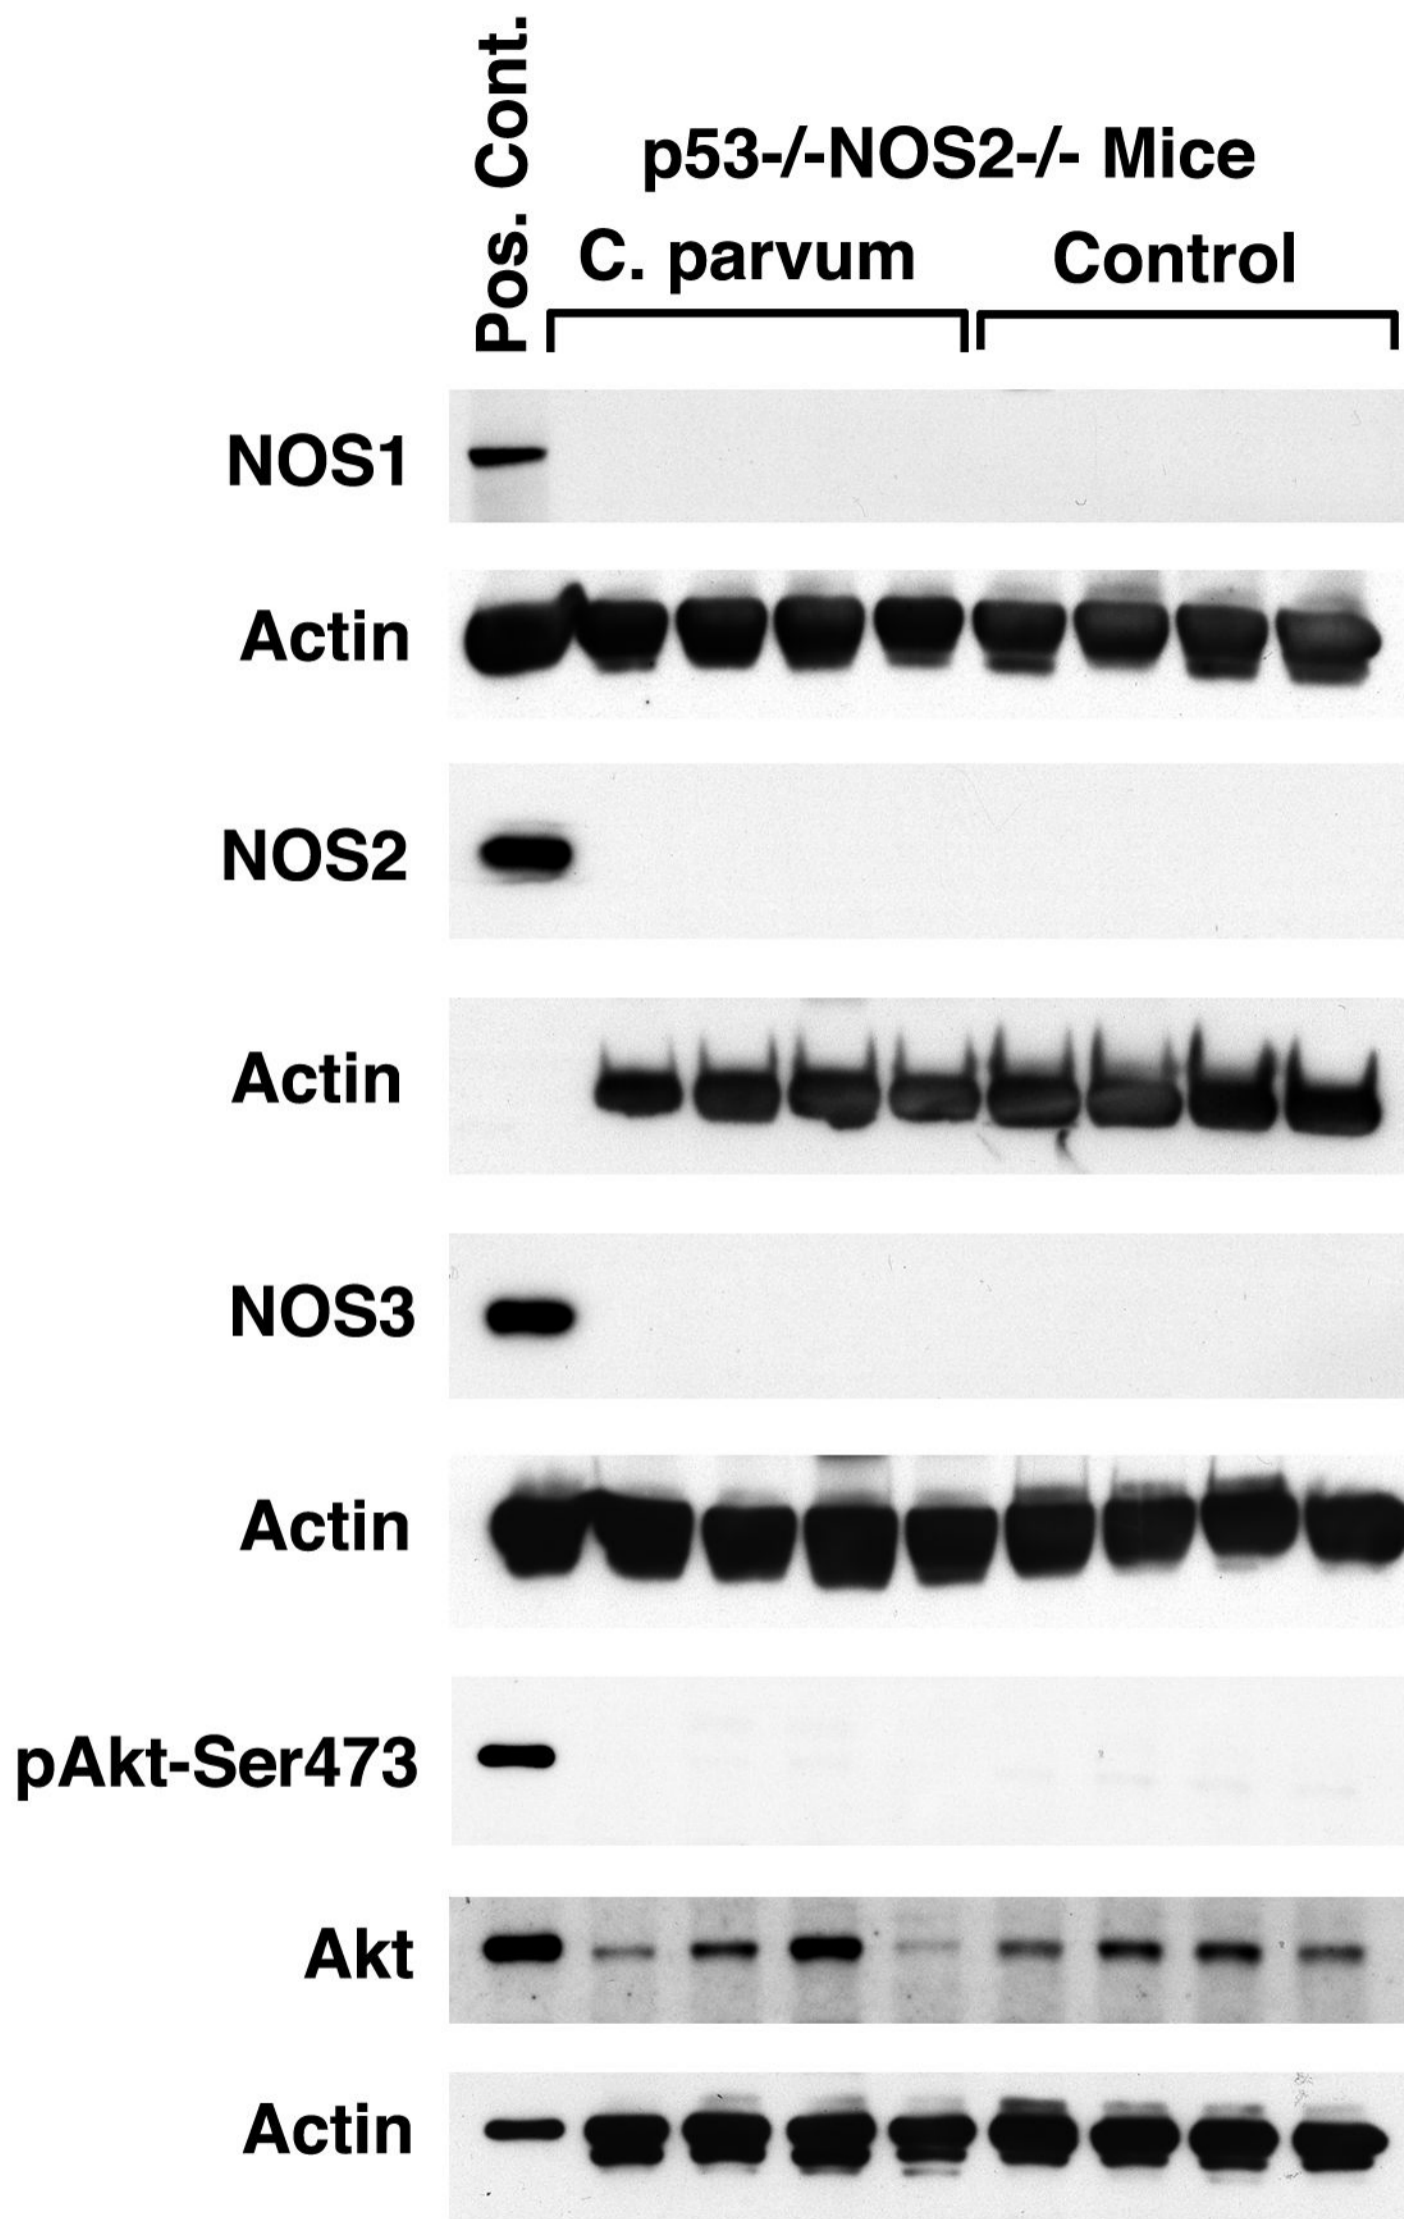

## Supplemental Fig 9

**C. parvum**

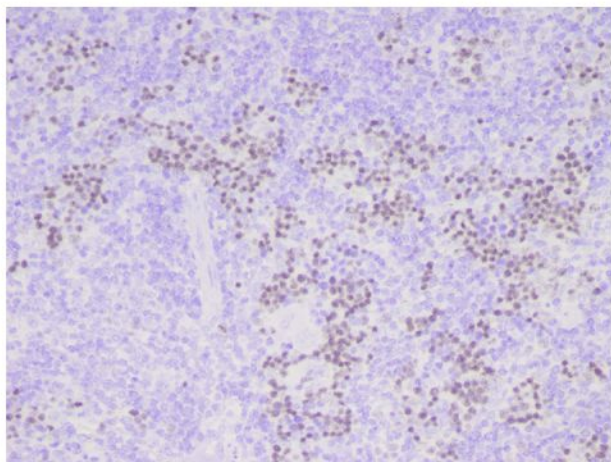

**Control**

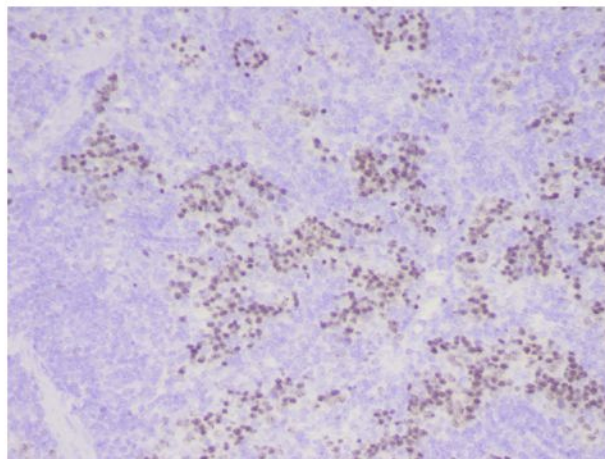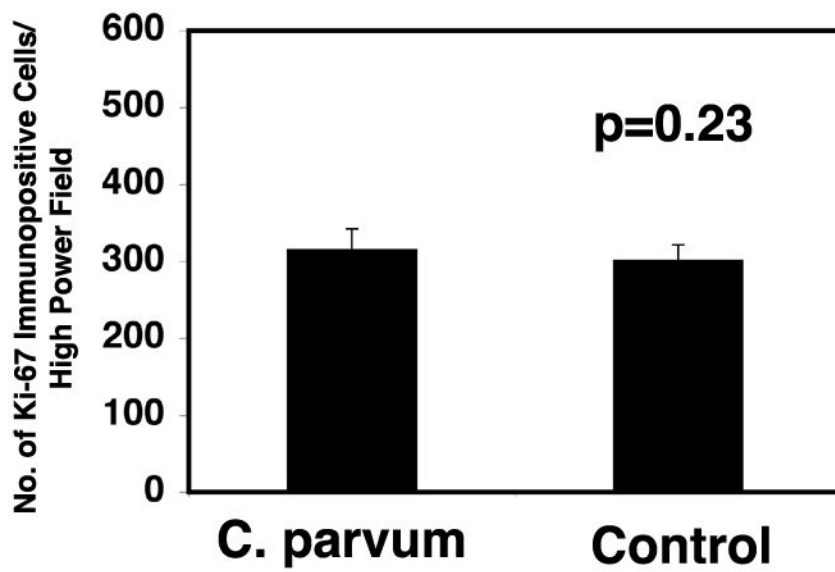

Supplement: NIHMS70192-supplement-Suppl_Data__Fi.pdf [file NIHMS70192-supplement-Suppl_Data__Fi.pdf]
